# Supplementary material for: Gold nanoparticles (GNP) induced redox modulation in organoselenium compounds: distinction between cyclic vs. linear structures
Source: Royal Society of Chemistry journal article supplement (doi:10.1039/c6ra15106j), 2016-01-01
Supplement: c6ra15106j1.pdf [file c6ra15106j1.pdf]

## Supplementary Information

### Gold nanoparticles (GNP) induced redox modulation in organoselenium compounds: Distinction between cyclic vs. linear structures

Pavitra V. Kumar<sup>1,2</sup>, Beena G. Singh<sup>1\*</sup>, Anand Ballal<sup>3</sup>, Vimal K. Jain<sup>4</sup>, Michio Iwaoka<sup>5</sup>, K. Indira Priyadarsini<sup>1,2\*</sup>

<sup>1</sup>Radiation & Photochemistry Division, <sup>2</sup>Homi Bhabha National Institute, Anushaktinagar, Mumbai – 400 094, India; <sup>3</sup>Molecular Biology Division, <sup>4</sup>Chemistry Division, Bhabha Atomic Research Centre, Trombay, Mumbai – 400 085, India; <sup>5</sup>Department of Chemistry, School of Science, Tokai University, Hiratsuka-shi, Kanagawa 259-1292, Japan.

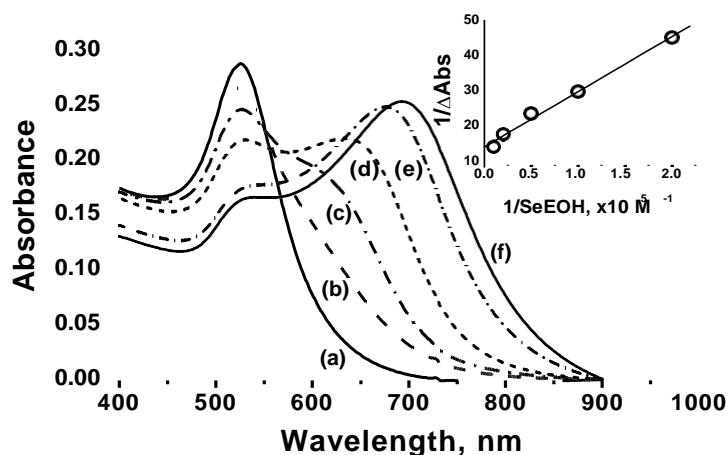

Figure S1: Absorption spectra of 7 nM GNP3 in absence (a) and in presence of (b) 5 μM, (c) 10 μM, (d) 20 μM, (e) 50 μM and (f) 100 μM SeEOH. Inset shows double reciprocal plot for GNP3 absorbance at 526 nm as a function of SeEOH concentration.

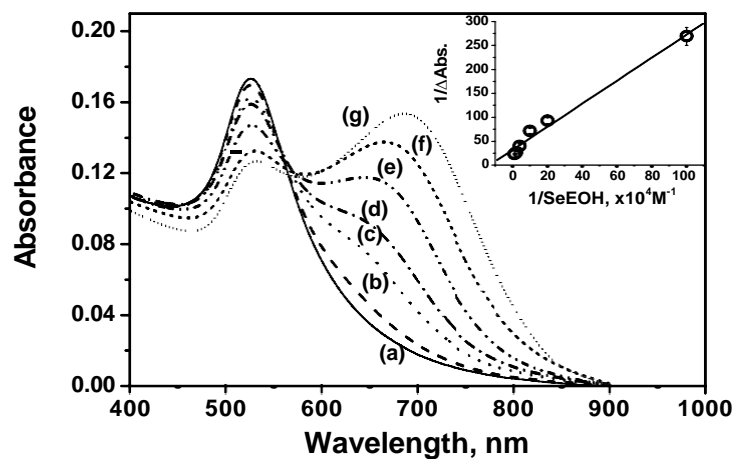

Figure S2: Absorption spectra of 7 nM GNP4 in absence (a) and in presence of (b) 5  $\mu\text{M}$ , (c) 10  $\mu\text{M}$ , (d) 25  $\mu\text{M}$ , (e) 50  $\mu\text{M}$ , (f) 75  $\mu\text{M}$  and (g) 100  $\mu\text{M}$  SeEOH. Inset shows double reciprocal plot for GNP4 absorbance at 527 nm as a function of SeEOH concentration.

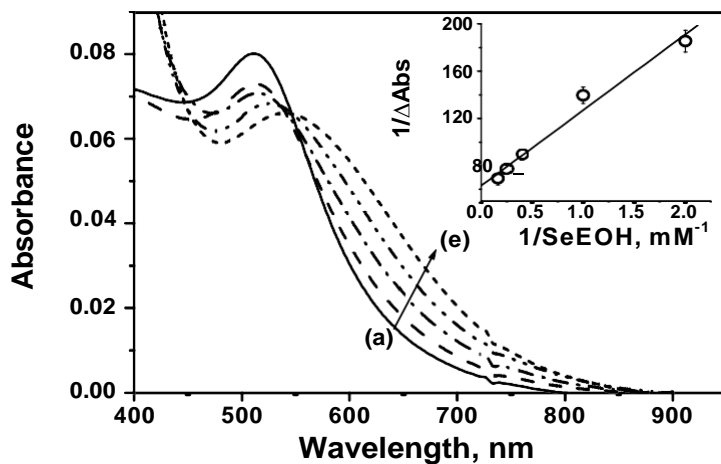

Figure S3: Absorption spectra of 7 nM GNP1 in absence (a) and in presence of (b) 0.5 mM, (c) 1 mM, (d) 2.5 mM and (e) 4 mM SeEOH. Inset shows double reciprocal plot for GNP1 absorbance at 510 nm as a function of SeEOH concentration.

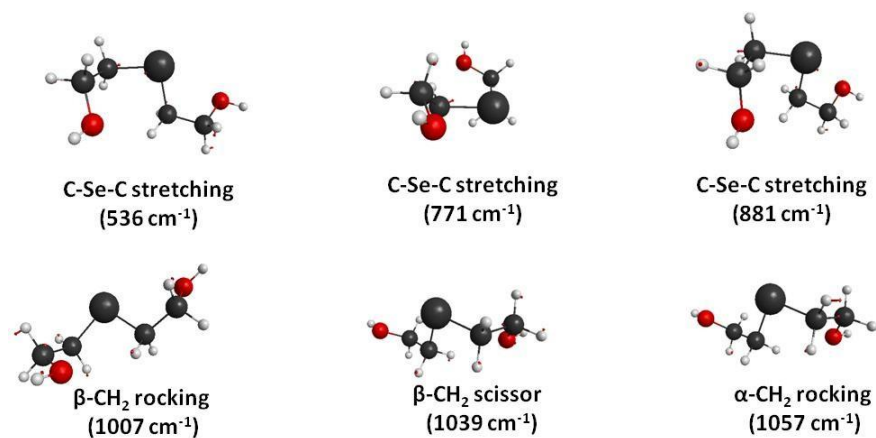

Figure S4: Images of molecular structure of SeEOH showing different vibrational modes in Raman spectra along with corresponding frequencies calculate at B3LYP/6-31+G(d,p) level in water using solvent density model.

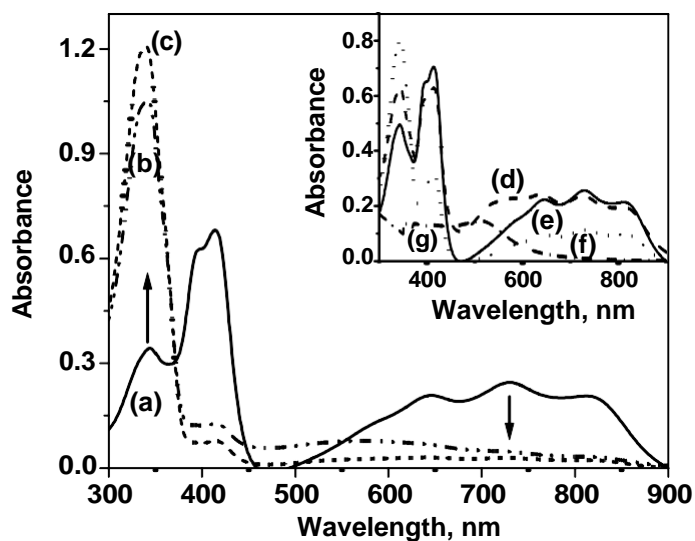

Figure S5: Absorption spectra of 30  $\mu\text{M}$   $\text{ABTS}^{\bullet-}$  radical in absence (a) and in presence of (b) 1 mM SeEOH-GNP1 and (c) DHS-GNP1 composites. Inset shows the absorption spectra of 30  $\mu\text{M}$   $\text{ABTS}^{\bullet-}$  radical in presence of (d) 7 nM GNP1, (e) 1 mM SeEOH, (f) 1 mM DHS. Spectral trace (g) in inset corresponds to 7 nM GNP1 alone.

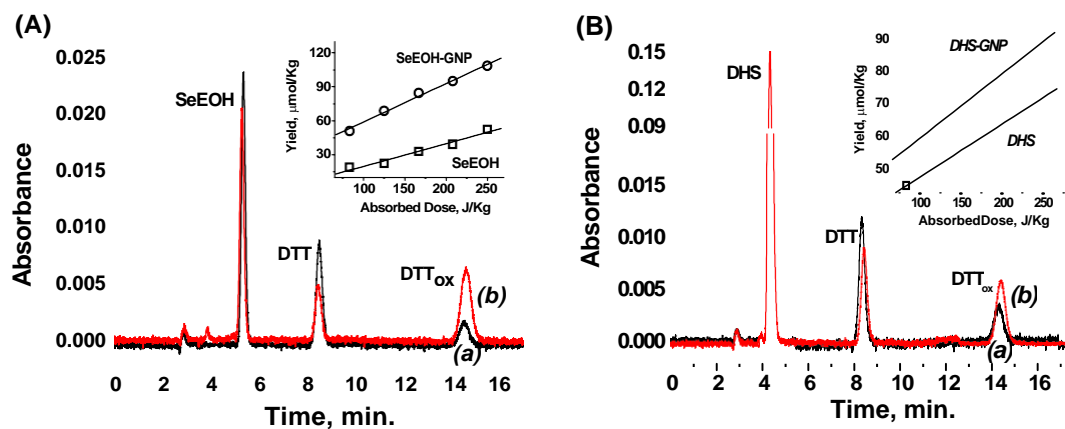

Figure S6: HPLC chromatogram of reaction mixture containing  $\gamma$ -radiolysed  $\text{N}_2\text{O}$  purged aqueous solution of 1 mM SeC (A-SeEOH, B-DHS) (a) in absence and (b) in presence of 7 nM GNP1. Insets (A) and (B) show the linear variation in the amount of  $\text{DTT}_{\text{ox}}$  formed as a function of absorbed dose.
